# Supplementary material for: Combustion derived single phase Y4Al2O9:Tb3+ nanophosphor: crystal chemistry and optical analysis for solid state lighting applications
Source: Royal Society of Chemistry journal article supplement (doi:10.1039/d3ra00735a), 2023-01-01
Supplement: d3ra00735a1.pdf [file d3ra00735a1.pdf]

## Combustion derived single phase $Y_4Al_2O_9:Tb^{3+}$ nanophosphor: Crystal chemistry and optical analysis for solid state lighting applications

Pawan Kumar<sup>a</sup>, Devender Singh<sup>a\*</sup>, Isha Gupta<sup>a</sup>, Sitender Singh<sup>a</sup>, Simran Nehra<sup>b</sup> and Ramesh Kumar<sup>c</sup>

<sup>a</sup>Department of Chemistry, Maharshi Dayanand University, Rohtak-124001, India.

<sup>b</sup>CSIR-National Physical Laboratory, Dr. K. S. Krishnan Marg, New Delhi-110012 India.

<sup>c</sup>Department of Chemistry, Kurukshetra University Kurukshetra-136119, Haryana, India.

### Electronic Supporting Information

**Table S1.** Type of bond and interionic bond distance (Å) of the optimized nanophosphor.

| Bond Type      | Bond Distance (Å) | Bond Type      | Bond Distance (Å) |
|----------------|-------------------|----------------|-------------------|
| Al(5)–O(8)     | 1.7358            | Tb2/Y(2)–O(9)  | 2.2547            |
| Al(5)–O(9)     | 1.7264            | Tb2/Y(2)–O(10) | 2.3604            |
| Al(5)–O(10)    | 1.7378            | Tb2/Y(2)–O(13) | 2.3251            |
| Al(5)–O(11)    | 1.7431            | Tb2/Y(2)–O(14) | 2.2802            |
| Al(6)–O(7)     | 1.7696            | Tb3/Y(3)–O(8)  | 2.3014            |
| Al(6)–O(11)    | 1.7998            | Tb3/Y(3)–O(10) | 2.2304            |
| Al(6)–O(12)    | 1.7368            | Tb3/Y(3)–O(11) | 2.3327            |
| Al(6)–O(13)    | 1.7614            | Tb3/Y(3)–O(12) | 2.2893            |
| Tb1/Y(1)–O(7)  | 2.4731            | Tb3/Y(3)–O(14) | 2.2803            |
| Tb1/Y(1)–O(8)  | 2.4862            | Tb3/Y(3)–O(15) | 2.2762            |
| Tb1/Y(1)–O(9)  | 2.2827            | Tb3/Y(3)–O(15) | 2.2909            |
| Tb1/Y(1)–O(11) | 2.3946            | Tb4/Y(4)–O(7)  | 2.3157            |
| Tb1/Y(1)–O(12) | 2.2690            | Tb4/Y(4)–O(10) | 2.2303            |
| Tb1/Y(1)–O(13) | 2.2958            | Tb4/Y(4)–O(12) | 2.2892            |
| Tb1/Y(1)–O(15) | 2.1999            | Tb4/Y(4)–O(14) | 2.3090            |
| Tb2/Y(2)–O(7)  | 2.2170            | Tb4/Y(4)–O(14) | 2.3712            |
| Tb2/Y(2)–O(8)  | 2.2707            | Tb4/Y(4)–O(15) | 2.3034            |

**Table S2.** Refined atomic characteristics of the optimized  $Y_{3.97}Al_2O_9:0.03Tb^{3+}$  nanophosphors.

| Atom | O.S | Wyck | Site   | x/a     | y/b      | z/c     | U[Å <sup>2</sup> ] |
|------|-----|------|--------|---------|----------|---------|--------------------|
| Y1   | +3  | 4e   | 0.9716 | 0.52210 | 0.10950  | 0.78520 | 0.0194             |
| Y2   | +3  | 4e   | 0.9485 | 0.02430 | 0.09590  | 0.80550 | 0.0191             |
| Y3   | +3  | 4e   | 0.9736 | 0.33930 | 0.12740  | 0.43690 | 0.0192             |
| Y4   | +3  | 4e   | 0.9512 | 0.83770 | 0.12140  | 0.41630 | 0.0194             |
| Al5  | +3  | 4e   | 1.0000 | 0.21560 | 0.18010  | 0.12770 | 0.0200             |
| Al6  | +3  | 4e   | 1.0000 | 0.65550 | 0.17740  | 0.11270 | 0.0200             |
| O7   | -2  | 4e   | 1.0000 | 0.78500 | 0.23530  | 0.74970 | 0.0200             |
| O8   | -2  | 4e   | 1.0000 | 0.23100 | 0.23690  | 0.76490 | 0.0200             |
| O9   | -2  | 4e   | 1.0000 | 0.21300 | 0.01840  | 0.15880 | 0.0200             |
| O10  | -2  | 4e   | 1.0000 | 0.07210 | 0.23490  | 0.98040 | 0.0200             |
| O11  | -2  | 4e   | 1.0000 | 0.42900 | 0.23940  | 0.11450 | 0.0200             |
| O12  | -2  | 4e   | 1.0000 | 0.63930 | 0.23200  | 0.96180 | 0.0200             |
| O13  | -2  | 4e   | 1.0000 | 0.69400 | 0.01700  | 0.16200 | 0.0200             |
| O14  | -2  | 4e   | 1.0000 | 0.08000 | -0.00400 | 0.3800  | 0.0200             |
| O15  | -2  | 4e   | 1.0000 | 0.56300 | 0.00520  | 0.39000 | 0.0200             |
| Tb1  | +3  | 4e   | 0.0284 | 0.23690 | 0.21160  | 0.07200 | 0.1487             |
| Tb2  | +3  | 4e   | 0.0515 | 0.21560 | 0.07484  | 0.21860 | 0.1265             |
| Tb3  | +3  | 4e   | 0.0264 | 0.39120 | 0.21540  | 0.07824 | 0.1124             |
| Tb4  | +3  | 4e   | 0.0488 | 0.21540 | 0.06480  | 0.21470 | 0.1468             |

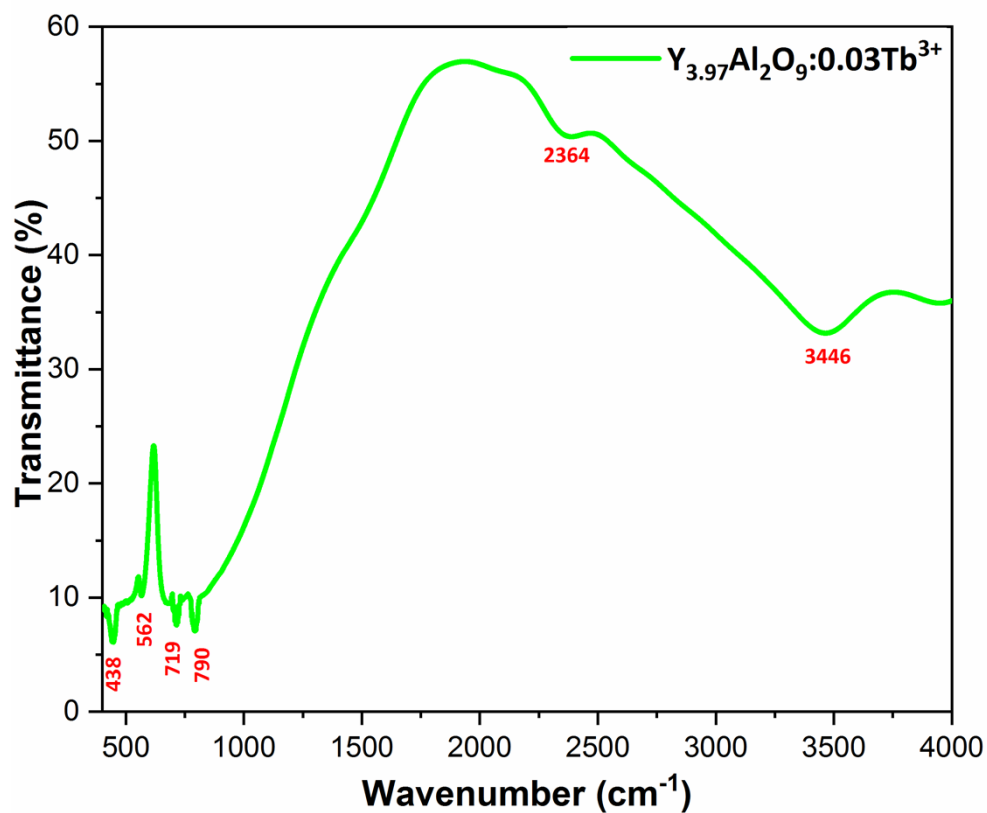

Fig. S1 FTIR spectral profile of  $Y_{3.97}Al_2O_9:0.03Tb^{3+}$  nanosample.

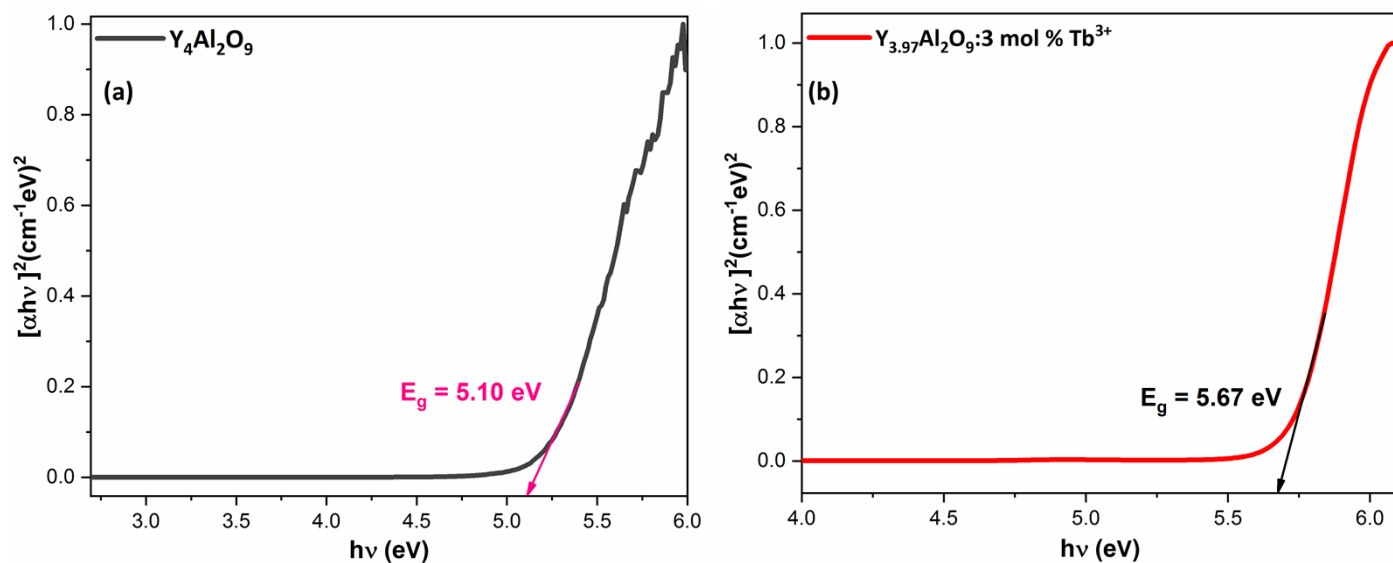

Fig. S2 Optical band gap profiles (a)  $Y_4Al_2O_9$  and (b)  $Y_{3.97}Al_2O_9:0.03Tb^{3+}$  nanosample.

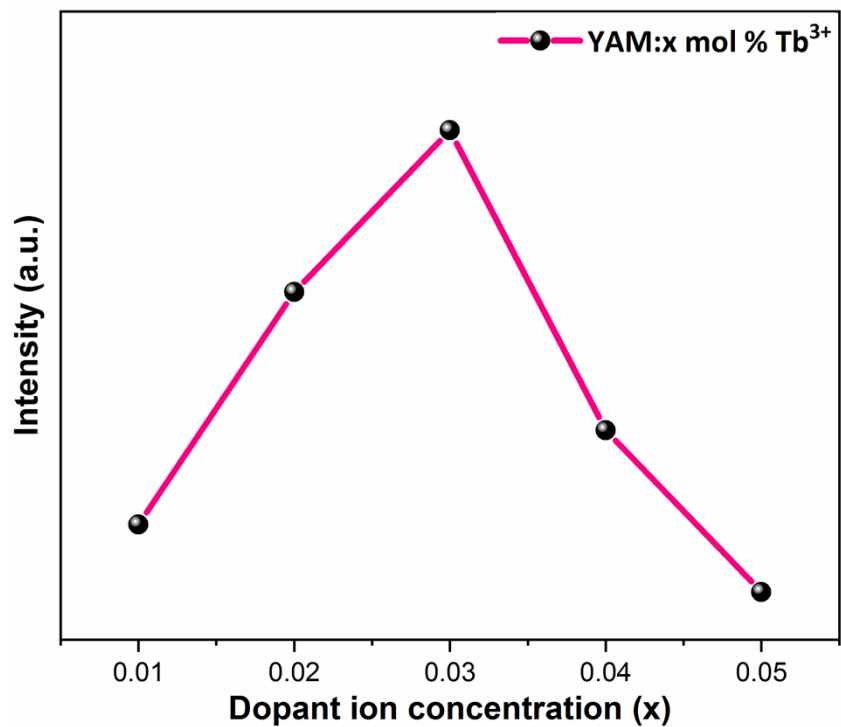

Fig. S3 Concentration quenching graph of  $Y_{4-x}Al_2O_9:xTb^{3+}$  ( $x=1-5$  mole %) nanophosphors.

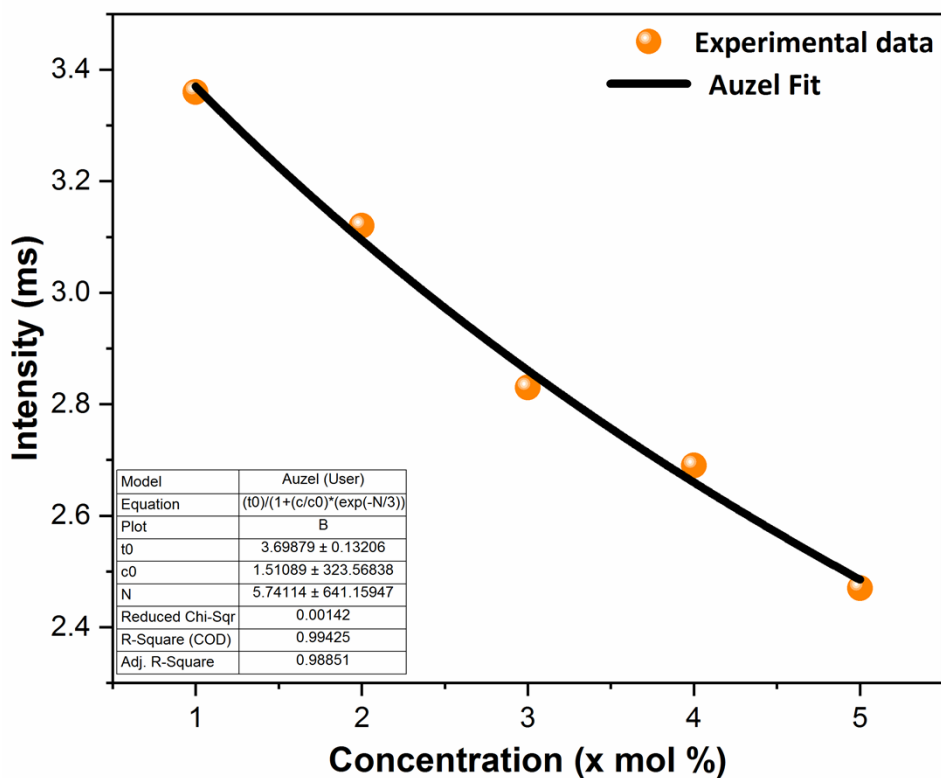

Fig. S4 Relation between decay time and dopant concentration (Auzel's fitting method).
